# Supplementary material for: Thioesterase superfamily member 1 suppresses cold thermogenesis by limiting the oxidation of lipid droplet-derived fatty acids in brown adipose tissue
Source: PubMed Central journal article supplement — Mol Metab. 2016 Feb 23;5(5):340–51. doi: 10.1016/j.molmet.2016.02.002 (PMC4837299; doi:10.1016/j.molmet.2016.02.002), 2016-02-23
Supplement: mmc5.pdf [file mmc5.pdf]

**Table S1. Mean rates of energy expenditure, mean respiratory exchange ratios, mean core body temperatures and mean physical activities as functions of ambient temperature**

|                                               |       |             | Temperature-dynamic        |                            |              |             | Temperature-equilibrated   |                            |              |         |
|-----------------------------------------------|-------|-------------|----------------------------|----------------------------|--------------|-------------|----------------------------|----------------------------|--------------|---------|
|                                               |       |             | <i>Them1<sup>+/-</sup></i> | <i>Them1<sup>-/-</sup></i> | Increase     | P value     | <i>Them1<sup>+/-</sup></i> | <i>Them1<sup>-/-</sup></i> | Increase     | P value |
| <b>Mean rate of energy expenditure (kJ/h)</b> | 30°C  | Total       | 1.05 ± 0.08                | 1.21 ± 0.08                | 0.17 ± 0.08  | 0.06        | 1.17 ± 0.04                | 1.26 ± 0.04                | 0.13 ± 0.08  | 0.24    |
|                                               |       | Light       | 0.96 ± 0.08                | 1.13 ± 0.08                | 0.17 ± 0.06  | 0.06        | 0.84 ± 0.04                | 0.96 ± 0.04                | 0.13 ± 0.08  | 0.22    |
|                                               |       | Dark        | 1.17 ± 0.08                | 1.34 ± 0.08                | 0.17 ± 0.08  | 0.08        | 1.42 ± 0.08                | 1.55 ± 0.08                | 0.08 ± 0.08  | 0.28    |
|                                               | 22°C  | Total       | 1.67 ± 0.04                | 1.88 ± 0.04                | 0.21 ± 0.08  | 0.005       | 1.76 ± 0.04                | 1.80 ± 0.04                | 0.04 ± 0.04  | 0.60    |
|                                               |       | Light       | 1.46 ± 0.04                | 1.67 ± 0.04                | 0.21 ± 0.08  | 0.003       | 1.55 ± 0.04                | 1.63 ± 0.04                | 0.08 ± 0.08  | 0.18    |
|                                               |       | Dark        | 1.92 ± 0.04                | 2.09 ± 0.04                | 0.17 ± 0.08  | 0.015       | 1.97 ± 0.04                | 1.97 ± 0.04                | -0.02 ± 0.08 | 0.76    |
|                                               | 15°C  | Total       | 2.43 ± 0.04                | 2.64 ± 0.04                | 0.21 ± 0.08  | 0.003       |                            |                            |              |         |
|                                               |       | Light       | 2.13 ± 0.04                | 2.47 ± 0.04                | 0.33 ± 0.08  | <0.0001     |                            |                            |              |         |
|                                               |       | Dark        | 2.68 ± 0.04                | 2.80 ± 0.04                | 0.13 ± 0.08  | 0.092       |                            |                            |              |         |
| 4°C                                           | Total | 3.26 ± 0.04 | 3.51 ± 0.04                | 0.25 ± 0.04                | <0.0001      | 3.31 ± 0.08 | 3.39 ± 0.04                | 0.09 ± 0.11                | 0.38         |         |
|                                               | Light | 3.05 ± 0.04 | 3.31 ± 0.04                | 0.25 ± 0.04                | <0.0001      | 3.14 ± 0.08 | 3.26 ± 0.08                | 0.12 ± 0.11                | 0.27         |         |
|                                               | Dark  | 3.47 ± 0.04 | 3.72 ± 0.04                | 0.21 ± 0.04                | 0.0003       | 3.47 ± 0.08 | 3.56 ± 0.08                | 0.07 ± 0.11                | 0.53         |         |
| <b>Mean respiratory exchange ratio</b>        | 30°C  | Total       | 0.83 ± 0.07                | 0.84 ± 0.07                | 0.00 ± 0.10  | 0.97        | 0.99 ± 0.01                | 1.00 ± 0.01                | 0.01 ± 0.01  | 0.27    |
|                                               |       | Light       | 0.81 ± 0.07                | 0.82 ± 0.07                | 0.01 ± 0.10  | 0.93        | 0.98 ± 0.01                | 1.00 ± 0.01                | 0.02 ± 0.01  | 0.09    |
|                                               |       | Dark        | 0.86 ± 0.07                | 0.85 ± 0.07                | 0.00 ± 0.10  | 0.99        | 0.99 ± 0.01                | 1.00 ± 0.01                | 0.01 ± 0.01  | 0.60    |
|                                               | 22°C  | Total       | 0.83 ± 0.06                | 0.83 ± 0.06                | 0.00 ± 0.08  | 0.98        | 0.94 ± 0.01                | 0.97 ± 0.01                | 0.03 ± 0.02  | 0.16    |
|                                               |       | Light       | 0.81 ± 0.06                | 0.80 ± 0.06                | -0.01 ± 0.08 | 0.88        | 0.87 ± 0.01                | 0.92 ± 0.01                | 0.05 ± 0.02  | 0.02    |
|                                               |       | Dark        | 0.85 ± 0.06                | 0.86 ± 0.06                | 0.01 ± 0.08  | 0.92        | 1.01 ± 0.01                | 1.02 ± 0.01                | 0.01 ± 0.02  | 0.69    |
|                                               | 15°C  | Total       | 0.81 ± 0.05                | 0.83 ± 0.05                | 0.02 ± 0.08  | 0.78        |                            |                            |              |         |
|                                               |       | Light       | 0.78 ± 0.05                | 0.79 ± 0.05                | 0.01 ± 0.08  | 0.86        |                            |                            |              |         |
|                                               |       | Dark        | 0.84 ± 0.05                | 0.87 ± 0.05                | 0.03 ± 0.08  | 0.70        |                            |                            |              |         |
| 4°C                                           | Total | 0.81 ± 0.05 | 0.81 ± 0.05                | 0.00 ± 0.07                | 0.95         | 0.93 ± 0.01 | 0.93 ± 0.01                | 0.00 ± 0.01                | 0.90         |         |
|                                               | Light | 0.78 ± 0.05 | 0.78 ± 0.05                | 0.00 ± 0.07                | 0.99         | 0.89 ± 0.01 | 0.90 ± 0.01                | 0.00 ± 0.01                | 0.43         |         |
|                                               | Dark  | 0.85 ± 0.05 | 0.84 ± 0.05                | -0.01 ± 0.07               | 0.92         | 0.97 ± 0.01 | 0.96 ± 0.01                | 0.00 ± 0.01                | 0.31         |         |
| <b>Mean core body temperature (°C)</b>        | 30°C  | Total       | 36.2 ± 0.10                | 36.0 ± 0.10                | -0.17 ± 0.15 | 0.27        | 36.4 ± 0.08                | 36.4 ± 0.08                | -0.05 ± 0.12 | 0.70    |
|                                               |       | Light       | 35.8 ± 0.11                | 35.9 ± 0.11                | 0.07 ± 0.16  | 0.67        | 35.9 ± 0.09                | 36.0 ± 0.09                | 0.05 ± 0.12  | 0.69    |
|                                               |       | Dark        | 36.5 ± 0.11                | 36.1 ± 0.11                | -0.40 ± 0.16 | 0.01        | 36.9 ± 0.09                | 36.7 ± 0.09                | -0.14 ± 0.12 | 0.25    |
|                                               | 22°C  | Total       | 35.7 ± 0.20                | 35.3 ± 0.20                | -0.46 ± 0.27 | 0.09        | 36.3 ± 0.09                | 36.2 ± 0.09                | -0.12 ± 0.14 | 0.39    |
|                                               |       | Light       | 35.3 ± 0.20                | 34.9 ± 0.20                | -0.41 ± 0.27 | 0.14        | 35.7 ± 0.10                | 35.7 ± 0.10                | -0.04 ± 0.14 | 0.76    |
|                                               |       | Dark        | 36.2 ± 0.20                | 35.6 ± 0.20                | -0.51 ± 0.27 | 0.06        | 36.8 ± 0.10                | 36.6 ± 0.10                | -0.19 ± 0.14 | 0.16    |
|                                               | 15°C  | Total       | 35.6 ± 0.26                | 35.5 ± 0.26                | -0.16 ± 0.37 | 0.67        |                            |                            |              |         |
|                                               |       | Light       | 35.3 ± 0.27                | 35.2 ± 0.27                | -0.12 ± 0.38 | 0.76        |                            |                            |              |         |
|                                               |       | Dark        | 35.9 ± 0.27                | 35.7 ± 0.27                | -0.20 ± 0.38 | 0.60        |                            |                            |              |         |
| 4°C                                           | Total | 35.5 ± 0.40 | 35.5 ± 0.40                | 0.03 ± 0.61                | 0.95         | 35.4 ± 0.10 | 35.2 ± 0.10                | -0.18 ± 0.20               | 0.35         |         |
|                                               | Light | 35.3 ± 0.43 | 35.3 ± 0.43                | 0.01 ± 0.61                | 0.99         | 35.1 ± 0.10 | 35.0 ± 0.10                | -0.10 ± 0.20               | 0.62         |         |
|                                               | Dark  | 35.7 ± 0.43 | 35.7 ± 0.43                | 0.06 ± 0.61                | 0.92         | 35.7 ± 0.10 | 35.4 ± 0.10                | -0.27 ± 0.20               | 0.17         |         |

**Table S1. Mean rates of energy expenditure, mean respiratory exchange ratios, mean core body temperatures and mean physical activities as functions of ambient temperature**

|                                            |      |       | Temperature-dynamic        |                            |              |         | Temperature-equilibrated   |                            |               |         |
|--------------------------------------------|------|-------|----------------------------|----------------------------|--------------|---------|----------------------------|----------------------------|---------------|---------|
|                                            |      |       | <i>Them1<sup>+/+</sup></i> | <i>Them1<sup>-/-</sup></i> | Increase     | P value | <i>Them1<sup>+/+</sup></i> | <i>Them1<sup>-/-</sup></i> | Increase      | P value |
| <b>Mean total activity (counts/h)</b>      | 30°C | Total | 265.0 ± 29.7               | 263.8 ± 29.7               | -1.2 ± 41.9  | 0.98    | 377.9 ± 35.6               | 287.8 ± 42.4               | -90.1 ± 54.7  | 0.10    |
|                                            |      | Light | 187.2 ± 31.7               | 235.4 ± 31.7               | 48.2 ± 44.8  | 0.28    | 159.1 ± 35.7               | 168.5 ± 43.7               | 9.4 ± 56.5    | 0.87    |
|                                            |      | Dark  | 342.8 ± 31.7               | 292.1 ± 31.7               | -50.6 ± 44.8 | 0.26    | 593.5 ± 35.7               | 405.4 ± 43.7               | -188.1 ± 56.4 | 0.0009  |
|                                            | 22°C | Total | 349.6 ± 33.0               | 322.3 ± 33.0               | -27.2 ± 46.7 | 0.56    | 352.9 ± 30.3               | 289.3 ± 30.3               | -63.6 ± 42.8  | 0.14    |
|                                            |      | Light | 313.7 ± 34.9               | 300.6 ± 34.9               | 13.1 ± 49.4  | 0.79    | 159.2 ± 31.4               | 184.9 ± 31.4               | 25.7 ± 44.4   | 0.56    |
|                                            |      | Dark  | 385.9 ± 35.0               | 344.4 ± 35.0               | -41.6 ± 49.5 | 0.40    | 543.8 ± 31.4               | 392.1 ± 31.4               | -151.7 ± 44.4 | 0.0006  |
|                                            | 15°C | Total | 305.9 ± 37.9               | 281.0 ± 37.9               | -24.9 ± 53.7 | 0.64    |                            |                            |               |         |
|                                            |      | Light | 289.9 ± 38.9               | 288.0 ± 38.9               | -1.8 ± 55.0  | 0.97    |                            |                            |               |         |
|                                            |      | Dark  | 321.9 ± 38.9               | 274.1 ± 38.9               | -47.9 ± 55.0 | 0.38    |                            |                            |               |         |
|                                            | 4°C  | Total | 275.1 ± 39.5               | 263.5 ± 39.5               | -11.5 ± 55.8 | 0.84    | 295.5 ± 12.2               | 210.5 ± 11.1               | -85.0 ± 18.3  | <0.0001 |
|                                            |      | Light | 278.3 ± 39.9               | 253.8 ± 39.9               | -24.6 ± 56.5 | 0.66    | 236.6 ± 14.3               | 172.6 ± 13.1               | -64.0 ± 14.4  | 0.001   |
|                                            |      | Dark  | 271.8 ± 40.0               | 273.5 ± 40.0               | 1.7 ± 56.5   | 0.98    | 353.9 ± 14.3               | 248.0 ± 13.1               | -105.7 ± 14.4 | <0.0001 |
| <b>Mean ambulatory activity (counts/h)</b> | 30°C | Total | 125.1 ± 35.8               | 162.4 ± 35.8               | 37.3 ± 50.6  | 0.46    | 194.8 ± 23.6               | 133.1 ± 28.9               | -61.6 ± 37.3  | 0.10    |
|                                            |      | Light | 75.1 ± 36.7                | 143.1 ± 36.7               | 68.0 ± 51.9  | 0.19    | 45.9 ± 24.3                | 64.2 ± 29.7                | 18.3 ± 38.4   | 0.64    |
|                                            |      | Dark  | 175.1 ± 36.7               | 181.7 ± 36.7               | 6.6 ± 51.9   | 0.90    | 341.5 ± 24.3               | 201.1 ± 29.7               | -140.0 ± 38.4 | 0.0003  |
|                                            | 22°C | Total | 144.1 ± 36.8               | 155.2 ± 36.8               | 11.1 ± 52.1  | 0.83    | 147.4 ± 20.5               | 128.1 ± 20.5               | -19.3 ± 29.0  | 0.51    |
|                                            |      | Light | 83.1 ± 37.5                | 131.6 ± 37.5               | 48.5 ± 53.1  | 0.36    | 38.2 ± 21.2                | 69.8 ± 21.2                | 31.5 ± 29.9   | 0.29    |
|                                            |      | Dark  | 206.0 ± 37.5               | 179.2 ± 37.5               | -26.9 ± 53.1 | 0.61    | 255.0 ± 21.2               | 185.6 ± 21.2               | -69.4 ± 29.9  | 0.02    |
|                                            | 15°C | Total | 104.3 ± 27.1               | 110.8 ± 27.1               | 6.5 ± 38.3   | 0.87    |                            |                            |               |         |
|                                            |      | Light | 67.0 ± 27.5                | 105.2 ± 27.5               | 38.2 ± 38.9  | 0.33    |                            |                            |               |         |
|                                            |      | Dark  | 141.6 ± 27.5               | 116.3 ± 27.5               | -25.2 ± 28.9 | 0.52    |                            |                            |               |         |
|                                            | 4°C  | Total | 59.6 ± 19.7                | 78.4 ± 19.7                | 18.8 ± 27.9  | 0.50    | 65.9 ± 6.2                 | 51.5 ± 5.9                 | -14.4 ± 8.4   | 0.089   |
|                                            |      | Light | 49.7 ± 19.8                | 67.3 ± 19.8                | 17.6 ± 28.1  | 0.53    | 42.9 ± 6.5                 | 38.4 ± 5.9                 | -4.4 ± 8.8    | 0.61    |
|                                            |      | Dark  | 69.7 ± 19.8                | 89.6 ± 19.9                | 19.9 ± 28.1  | 0.48    | 88.6 ± 6.5                 | 64.4 ± 5.9                 | -24.2 ± 8.8   | 0.006   |
