# Supplementary material for: Thioesterase superfamily member 1 suppresses cold thermogenesis by limiting the oxidation of lipid droplet-derived fatty acids in brown adipose tissue
Source: PubMed Central journal article supplement — Mol Metab. 2016 Feb 23;5(5):340–51. doi: 10.1016/j.molmet.2016.02.002 (PMC4837299; doi:10.1016/j.molmet.2016.02.002), 2016-02-23
Supplement: mmc6.pdf [file mmc6.pdf]

**Table S2. Dependence of BAT gene expression on *Them1* expression and ambient temperature**

| Genes                |                       | 22 °C                       |                             | 4 °C                        |                             |                             |                             |
|----------------------|-----------------------|-----------------------------|-----------------------------|-----------------------------|-----------------------------|-----------------------------|-----------------------------|
|                      |                       | -                           |                             | 24 h                        |                             | 96 h                        |                             |
|                      |                       | <i>Them1</i> <sup>+/+</sup> | <i>Them1</i> <sup>-/-</sup> | <i>Them1</i> <sup>+/+</sup> | <i>Them1</i> <sup>-/-</sup> | <i>Them1</i> <sup>+/+</sup> | <i>Them1</i> <sup>-/-</sup> |
| Differentiation      | <i>Ap2</i>            | 1.00 ± 0.06                 | 1.38 ± 0.16                 | 2.75 ± 0.30 <sup>†</sup>    | 2.49 ± 0.42 <sup>†</sup>    | 1.32 ± 0.24                 | 0.77 ± 0.11 <sup>†</sup>    |
|                      | <i>Prdm16</i>         | 1.00 ± 0.25                 | 1.96 ± 0.56                 | 1.10 ± 0.21                 | 1.71 ± 0.32                 | 0.79 ± 0.13                 | 1.01 ± 0.31                 |
|                      | <i>C/ebpβ</i>         | 1.00 ± 0.26                 | 1.55 ± 0.48                 | 1.21 ± 0.39                 | 1.07 ± 0.17                 | 1.71 ± 0.11 <sup>†</sup>    | 1.98 ± 0.57                 |
|                      | <i>Cidea</i>          | 1.00 ± 0.23                 | 1.00 ± 0.12                 | 1.00 ± 0.10                 | 1.06 ± 0.17                 | 1.08 ± 0.15                 | 0.80 ± 0.11                 |
|                      | <i>mtTfa</i>          | 1.00 ± 0.11                 | 0.97 ± 0.12                 | 1.18 ± 0.17                 | 1.30 ± 0.13                 | 1.13 ± 0.11                 | 0.92 ± 0.05                 |
| Thermogenesis        | <i>Ucp1</i>           | 1.00 ± 0.10                 | 0.93 ± 0.14                 | 4.17 ± 0.30 <sup>†</sup>    | 3.21 ± 0.18 <sup>†</sup>    | 2.71 ± 0.14 <sup>†</sup>    | 2.21 ± 0.13 <sup>†</sup>    |
|                      | <i>Pgc1α</i>          | 1.00 ± 0.21                 | 0.97 ± 0.24                 | 3.03 ± 0.45 <sup>†</sup>    | 1.58 ± 0.45                 | 1.68 ± 0.17 <sup>†</sup>    | 2.65 ± 0.44 <sup>†</sup>    |
|                      | <i>Pparγ</i>          | 1.00 ± 0.20                 | 1.11 ± 0.09                 | 0.84 ± 0.17                 | 0.79 ± 0.23                 | 1.08 ± 0.05                 | 1.26 ± 0.26                 |
| Fatty acid oxidation | <i>Pparα</i>          | 1.00 ± 0.17                 | 0.90 ± 0.11                 | 1.26 ± 0.20                 | 0.70 ± 0.04                 | 0.91 ± 0.14                 | 0.71 ± 0.11                 |
|                      | <i>m-Cpt1</i>         | 1.00 ± 0.17                 | 0.77 ± 0.11                 | 1.81 ± 0.21 <sup>†</sup>    | 1.32 ± 0.19 <sup>†</sup>    | 1.46 ± 0.07 <sup>†</sup>    | 1.15 ± 0.16                 |
|                      | <i>Mcad</i>           | 1.00 ± 0.07                 | 0.92 ± 0.10                 | 1.28 ± 0.12                 | 1.25 ± 0.17                 | 1.46 ± 0.13 <sup>†</sup>    | 1.18 ± 0.18                 |
|                      | <i>Acox</i>           | 1.00 ± 0.09                 | 1.08 ± 0.08                 | 1.61 ± 0.12 <sup>†</sup>    | 1.25 ± 0.13                 | 1.53 ± 0.10 <sup>†</sup>    | 1.22 ± 0.21                 |
|                      | <i>Acs1</i>           | 1.00 ± 0.11                 | 1.30 ± 0.16                 | 2.36 ± 0.21 <sup>†</sup>    | 1.86 ± 0.10 <sup>†</sup>    | 1.55 ± 0.22 <sup>†</sup>    | 1.66 ± 0.32                 |
|                      | <i>Fabp3</i>          | 1.00 ± 0.09                 | 1.13 ± 0.11                 | 4.68 ± 0.58 <sup>†</sup>    | 4.07 ± 0.27 <sup>†</sup>    | 2.96 ± 0.17 <sup>†</sup>    | 3.35 ± 0.37 <sup>†</sup>    |
|                      | <i>Lpl</i>            | 1.00 ± 0.08                 | 1.44 ± 0.15                 | 2.36 ± 0.34 <sup>†</sup>    | 1.99 ± 0.10                 | 1.90 ± 0.08*                | 1.37 ± 0.17                 |
| Lipogenesis          | <i>Vldl-r</i>         | 1.00 ± 0.06                 | 1.06 ± 0.11                 | 1.51 ± 0.13 <sup>†</sup>    | 1.51 ± 0.11 <sup>†</sup>    | 1.31 ± 0.05                 | 1.51 ± 0.20                 |
|                      | <i>Gpat1</i>          | 1.00 ± 0.14                 | 0.68 ± 0.11                 | 2.87 ± 0.37 <sup>†</sup>    | 1.78 ± 0.43 <sup>†</sup>    | 1.72 ± 0.11 <sup>†</sup>    | 1.43 ± 0.34                 |
|                      | <i>Gpat4</i>          | 1.00 ± 0.12                 | 1.06 ± 0.12                 | 1.67 ± 0.19 <sup>†</sup>    | 1.33 ± 0.08                 | 1.29 ± 0.06                 | 1.05 ± 0.19                 |
|                      | <i>Acot1</i>          | 1.00 ± 0.11                 | 1.49 ± 0.27                 | 3.34 ± 0.92 <sup>†</sup>    | 2.87 ± 0.46 <sup>†</sup>    | 1.33 ± 0.16                 | 1.58 ± 0.39                 |
| Acots                | <i>Acot2</i>          | 1.00 ± 0.41                 | 0.73 ± 0.15                 | 1.33 ± 0.31                 | 0.87 ± 0.18                 | 0.69 ± 0.11                 | 1.07 ± 0.28                 |
|                      | <i>Acot3</i>          | 1.00 ± 0.27                 | 0.89 ± 0.22                 | 2.18 ± 0.55                 | 1.02 ± 0.28                 | 1.19 ± 0.38                 | 1.30 ± 0.62                 |
|                      | <i>Acot4</i>          | 1.00 ± 0.30                 | 1.23 ± 0.13                 | 3.15 ± 0.77 <sup>†</sup>    | 2.00 ± 0.50                 | 0.89 ± 0.10                 | 1.36 ± 0.50                 |
|                      | <i>Acot5</i>          | 1.00 ± 0.24                 | 1.08 ± 0.22                 | 19.69 ± 8.10 <sup>†</sup>   | 3.20 ± 1.33                 | 5.57 ± 1.61 <sup>†</sup>    | 2.39 ± 0.45 <sup>†</sup>    |
|                      | <i>Acot6</i>          | 1.00 ± 0.09                 | 1.50 ± 0.24                 | 1.69 ± 0.26 <sup>†</sup>    | 1.22 ± 0.12                 | 1.05 ± 0.08                 | 0.99 ± 0.17                 |
|                      | <i>Acot7</i>          | 1.00 ± 0.15                 | 0.73 ± 0.08                 | 1.18 ± 0.23                 | 1.05 ± 0.08                 | 1.15 ± 0.28                 | 1.23 ± 0.22                 |
|                      | <i>Acot8</i>          | 1.00 ± 0.18                 | 0.71 ± 0.07                 | 2.72 ± 0.30 <sup>†</sup>    | 1.60 ± 0.23 <sup>†*</sup>   | 2.23 ± 0.36 <sup>†</sup>    | 2.28 ± 0.71                 |
|                      | <i>Acot9/10</i>       | 1.00 ± 0.10                 | 0.97 ± 0.12                 | 1.47 ± 0.10                 | 1.37 ± 0.17                 | 1.37 ± 0.11                 | 1.18 ± 0.05                 |
|                      | <i>Acot12</i>         | 1.00 ± 0.26                 | 1.26 ± 0.27                 | 6.63 ± 3.02 <sup>†</sup>    | 4.34 ± 1.13 <sup>†</sup>    | 4.82 ± 0.66 <sup>†</sup>    | 5.49 ± 1.08 <sup>†</sup>    |
|                      | <i>Acot13 (Them2)</i> | 1.00 ± 0.14                 | 1.00 ± 0.15                 | 1.16 ± 0.10                 | 1.05 ± 0.10                 | 1.35 ± 0.19                 | 1.35 ± 0.33                 |

BAT isolated from mice (n = 4 - 6 group) housed at 22°C or exposed to 4°C for 24 h or 96 h was analyzed for mRNA expression. mRNA expression levels were normalized to values in BAT of *Them1*<sup>+/+</sup> mice at 22°C. \*P < 0.05 *Them1*<sup>-/-</sup> vs *Them1*<sup>+/+</sup>; †P < 0.05, 4°C vs 22°C.
