# Supplementary material for: Thioesterase superfamily member 1 suppresses cold thermogenesis by limiting the oxidation of lipid droplet-derived fatty acids in brown adipose tissue
Source: PubMed Central journal article supplement — Mol Metab. 2016 Feb 23;5(5):340–51. doi: 10.1016/j.molmet.2016.02.002 (PMC4837299; doi:10.1016/j.molmet.2016.02.002), 2016-02-23
Supplement: mmc7.pdf [file mmc7.pdf]

**Table S3. Dependence of primary brown adipocyte gene expression on Them1 expression and chronic NE treatment**

| NE pretreatment :    |                 | -                           |                             | +                           |                             | -             |                          | +                        |                           |
|----------------------|-----------------|-----------------------------|-----------------------------|-----------------------------|-----------------------------|---------------|--------------------------|--------------------------|---------------------------|
|                      |                 | <i>Them1</i> <sup>+/+</sup> | <i>Them1</i> <sup>-/-</sup> | <i>Them1</i> <sup>+/+</sup> | <i>Them1</i> <sup>-/-</sup> | <i>Ad-GFP</i> | <i>Ad-Them1</i>          | <i>Ad-GFP</i>            | <i>Ad-Them1</i>           |
| Differentiation      | <i>Ap2</i>      | 1.00 ± 0.04                 | 0.89 ± 0.04                 | 1.14 ± 0.03                 | 1.23 ± 0.05 <sup>†</sup>    | 1.00 ± 0.02   | 1.19 ± 0.03*             | 1.12 ± 0.04              | 1.28 ± 0.03*              |
|                      | <i>Prdm16</i>   | 1.00 ± 0.03                 | 0.82 ± 0.06                 | 1.01 ± 0.09                 | 0.91 ± 0.08                 | 1.00 ± 0.06   | 0.98 ± 0.15              | 1.06 ± 0.08              | 0.92 ± 0.06               |
|                      | <i>C/ebpβ</i>   | 1.00 ± 0.03                 | 0.91 ± 0.03                 | 1.11 ± 0.03                 | 1.05 ± 0.04                 | 1.00 ± 0.03   | 0.92 ± 0.10              | 0.93 ± 0.06              | 0.84 ± 0.01               |
|                      | <i>Cidea</i>    | 1.00 ± 0.01                 | 0.58 ± 0.02*                | 1.15 ± 0.11                 | 0.72 ± 0.03*                | 1.00 ± 0.03   | 1.25 ± 0.08              | 1.67 ± 0.05 <sup>†</sup> | 1.57 ± 0.05 <sup>†</sup>  |
|                      | <i>mtTfa</i>    | 1.00 ± 0.07                 | 0.82 ± 0.01                 | 1.16 ± 0.07                 | 1.01 ± 0.04                 | 1.00 ± 0.02   | 1.29 ± 0.04 <sup>†</sup> | 1.43 ± 0.04 <sup>†</sup> | 1.37 ± 0.04               |
| Thermogenesis        | <i>Ucp1</i>     | 1.00 ± 0.03                 | 1.22 ± 0.06                 | 6.17 ± 0.93 <sup>†</sup>    | 5.36 ± 0.22 <sup>†</sup>    | 1.00 ± 0.04   | 1.34 ± 0.04              | 5.96 ± 0.38 <sup>†</sup> | 4.72 ± 0.18 <sup>†</sup>  |
|                      | <i>Pgc1α</i>    | 1.00 ± 0.06                 | 0.62 ± 0.03 <sup>†</sup>    | 1.00 ± 0.07                 | 0.74 ± 0.06 <sup>†</sup>    | 1.00 ± 0.08   | 0.95 ± 0.10              | 1.10 ± 0.06              | 1.04 ± 0.06               |
|                      | <i>Pparγ</i>    | 1.00 ± 0.06                 | 0.83 ± 0.05                 | 1.31 ± 0.11 <sup>†</sup>    | 1.43 ± 0.05 <sup>†</sup>    | 1.00 ± 0.02   | 1.22 ± 0.05*             | 1.27 ± 0.06 <sup>†</sup> | 1.60 ± 0.08 <sup>†*</sup> |
| Fatty acid oxidation | <i>Pparaα</i>   | 1.00 ± 0.05                 | 0.63 ± 0.04*                | 1.13 ± 0.06                 | 0.83 ± 0.05*                | 1.00 ± 0.09   | 0.97 ± 0.09              | 1.00 ± 0.09              | 0.78 ± 0.07               |
|                      | <i>m-Cpt1</i>   | 1.00 ± 0.03                 | 0.81 ± 0.02*                | 1.04 ± 0.04                 | 0.92 ± 0.04                 | 1.00 ± 0.06   | 1.16 ± 0.13              | 1.09 ± 0.07              | 1.23 ± 0.07               |
|                      | <i>Mcad</i>     | 1.00 ± 0.05                 | 0.86 ± 0.03                 | 1.37 ± 0.04 <sup>†</sup>    | 1.30 ± 0.07 <sup>†</sup>    | 1.00 ± 0.03   | 1.13 ± 0.02              | 1.21 ± 0.04 <sup>†</sup> | 1.28 ± 0.04 <sup>†</sup>  |
|                      | <i>Acox</i>     | 1.00 ± 0.05                 | 0.84 ± 0.05                 | 1.10 ± 0.07                 | 1.33 ± 0.07 <sup>†</sup>    | 1.00 ± 0.03   | 1.03 ± 0.03              | 1.05 ± 0.02              | 1.15 ± 0.04               |
|                      | <i>Acs1</i>     | 1.00 ± 0.04                 | 0.84 ± 0.03                 | 1.38 ± 0.03 <sup>†</sup>    | 1.38 ± 0.05 <sup>†</sup>    | 1.00 ± 0.02   | 1.11 ± 0.05              | 1.22 ± 0.02 <sup>†</sup> | 1.30 ± 0.06 <sup>†</sup>  |
|                      | <i>Fabp3</i>    | 1.00 ± 0.04                 | 0.72 ± 0.02*                | 0.67 ± 0.03 <sup>†</sup>    | 0.48 ± 0.03 <sup>†*</sup>   | 1.00 ± 0.04   | 1.09 ± 0.02              | 0.90 ± 0.05              | 0.51 ± 0.01 <sup>†*</sup> |
| Lipogenesis          | <i>Lpl</i>      | 1.00 ± 0.07                 | 0.83 ± 0.03                 | 0.94 ± 0.02                 | 0.91 ± 0.05                 | 1.00 ± 0.03   | 1.05 ± 0.05              | 1.11 ± 0.03              | 1.18 ± 0.02               |
|                      | <i>Vldl-r</i>   | 1.00 ± 0.05                 | 0.99 ± 0.03                 | 1.16 ± 0.03                 | 1.38 ± 0.05 <sup>†*</sup>   | 1.00 ± 0.05   | 1.07 ± 0.05              | 1.25 ± 0.03 <sup>†</sup> | 1.21 ± 0.05               |
|                      | <i>Gpat1</i>    | 1.00 ± 0.04                 | 0.76 ± 0.04 <sup>†</sup>    | 1.35 ± 0.07 <sup>†</sup>    | 1.27 ± 0.07 <sup>†</sup>    | 1.00 ± 0.05   | 1.01 ± 0.10              | 1.36 ± 0.05 <sup>†</sup> | 1.43 ± 0.04 <sup>†</sup>  |
|                      | <i>Gpat4</i>    | 1.00 ± 0.03                 | 0.87 ± 0.02                 | 1.20 ± 0.03 <sup>†</sup>    | 1.12 ± 0.05 <sup>†</sup>    | 1.00 ± 0.02   | 1.00 ± 0.04              | 1.22 ± 0.03 <sup>†</sup> | 1.12 ± 0.04               |
| Acots                | <i>Them1</i>    | 1.00 ± 0.09                 | 0.01 ± 0.00*                | 1.11 ± 0.20                 | 0.01 ± 0.00*                | 0.00 ± 0.00   | 1.00 ± 0.02*             | 0.00 ± 0.00              | 0.96 ± 0.02*              |
|                      | <i>Acot1</i>    | 1.00 ± 0.14                 | 0.87 ± 0.03                 | 0.96 ± 0.03                 | 0.86 ± 0.03                 | 1.00 ± 0.03   | 0.99 ± 0.03              | 1.11 ± 0.06              | 1.04 ± 0.02               |
|                      | <i>Acot2</i>    | 1.00 ± 0.06                 | 0.86 ± 0.14                 | 0.79 ± 0.08                 | 0.54 ± 0.11                 | 1.00 ± 0.09   | 0.80 ± 0.12              | 1.22 ± 0.21              | 1.14 ± 0.15               |
|                      | <i>Acot3</i>    | 1.00 ± 0.05                 | 0.89 ± 0.05                 | 1.10 ± 0.06                 | 1.17 ± 0.05                 | 1.00 ± 0.04   | 0.93 ± 0.15              | 1.09 ± 0.07              | 1.00 ± 0.05               |
|                      | <i>Acot4</i>    | 1.00 ± 0.05                 | 0.98 ± 0.03                 | 1.36 ± 0.07 <sup>†</sup>    | 1.41 ± 0.07 <sup>†</sup>    | 1.00 ± 0.02   | 1.10 ± 0.06              | 1.13 ± 0.05              | 1.04 ± 0.02               |
|                      | <i>Acot5</i>    | 1.00 ± 0.09                 | 1.31 ± 0.21                 | 2.30 ± 0.20 <sup>†</sup>    | 1.95 ± 0.13 <sup>†</sup>    | 1.00 ± 0.21   | 0.98 ± 0.06              | 2.17 ± 0.09 <sup>†</sup> | 1.87 ± 0.04 <sup>†</sup>  |
|                      | <i>Acot6</i>    | 1.00 ± 0.03                 | 1.02 ± 0.03                 | 1.24 ± 0.03                 | 1.16 ± 0.04                 | 1.00 ± 0.03   | 1.07 ± 0.02              | 1.06 ± 0.01              | 1.12 ± 0.02               |
|                      | <i>Acot7</i>    | 1.00 ± 0.01                 | 1.00 ± 0.02                 | 0.98 ± 0.02                 | 0.93 ± 0.03                 | 1.00 ± 0.02   | 1.02 ± 0.02              | 0.97 ± 0.02              | 0.95 ± 0.01               |
|                      | <i>Acot8</i>    | 1.00 ± 0.02                 | 1.01 ± 0.02                 | 1.26 ± 0.02                 | 1.12 ± 0.04                 | 1.00 ± 0.01   | 1.00 ± 0.06              | 1.10 ± 0.02              | 1.13 ± 0.02               |
|                      | <i>Acot9/10</i> | 1.00 ± 0.02                 | 1.09 ± 0.03                 | 1.32 ± 0.03 <sup>†</sup>    | 1.29 ± 0.05 <sup>†</sup>    | 1.00 ± 0.02   | 1.04 ± 0.02              | 1.19 ± 0.02              | 1.16 ± 0.03               |
|                      | <i>Acot12</i>   | 1.00 ± 0.09                 | 0.87 ± 0.10                 | 1.33 ± 0.10                 | 0.82 ± 0.09*                | 1.00 ± 0.07   | 0.98 ± 0.06              | 1.98 ± 0.14 <sup>†</sup> | 1.70 ± 0.08 <sup>†</sup>  |
|                      | <i>Them2</i>    | 1.00 ± 0.04                 | 0.85 ± 0.03                 | 1.00 ± 0.01                 | 0.95 ± 0.03                 | 1.00 ± 0.02   | 1.03 ± 0.02              | 0.87 ± 0.02 <sup>†</sup> | 0.83 ± 0.02 <sup>†</sup>  |

mRNA expression levels were normalized to values in primary brown adipocytes of *Them1*<sup>+/+</sup> or *Ad-GFP* cells without NE pretreatment (1μM) except *Them1* infected adenovirus groups, which were normalized to values of *Ad-Them1* without NE pretreatment. \**P* < 0.05 *Them1*<sup>-/-</sup> vs *Them1*<sup>+/+</sup> or *Ad-GFP* vs *Ad-Them1*; <sup>†</sup>*P* < 0.05, NE pretreatment vs no pretreatment.
